# Supplementary material
Source: MDPI journal article supplement (https://www.mdpi.com/2073-4395/13/1/50)
Supplement: s1 [file s1]

## Supplementary materials

### Remediation of Post Tin-mined Land - Evaluation of Local Soil Amendments on Crop Yield and Drought Resistance

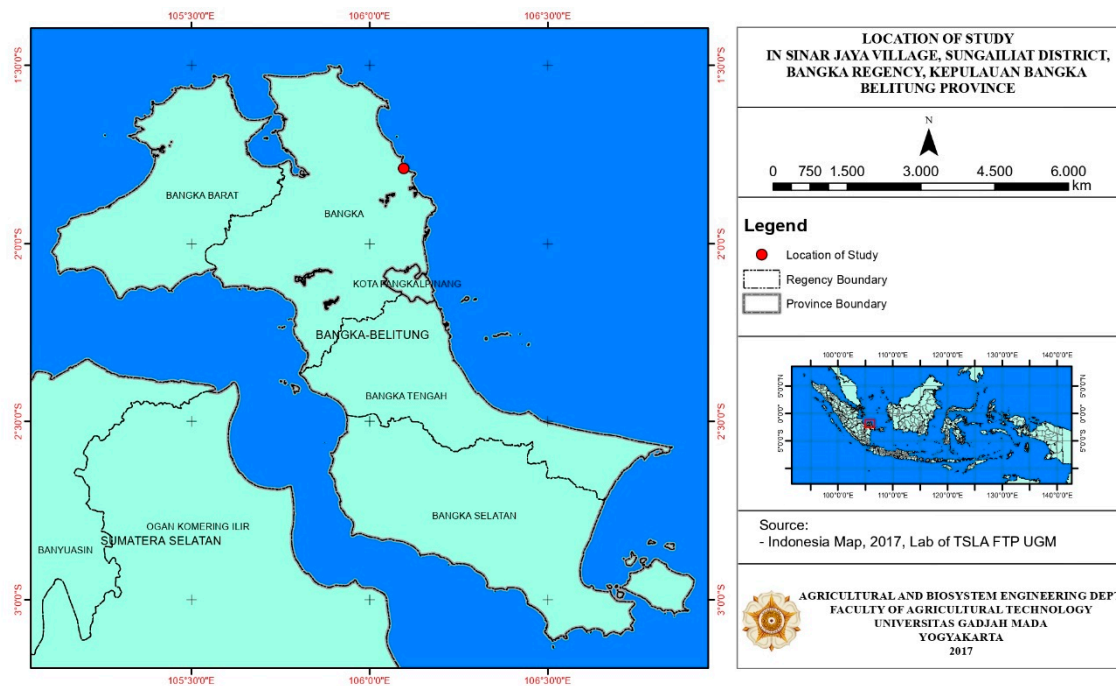

**Figure S1.** Study site in Bangka Regency, Bangka Belitung Islands Province, Indonesia. The red point indicates the location of the plot experiment.

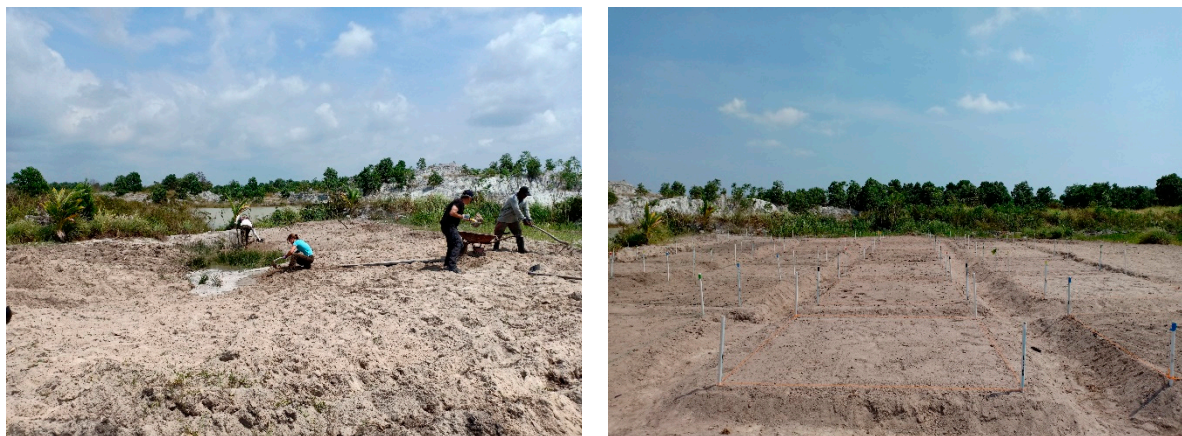

**Figure S2.** Initial condition of the experimental site

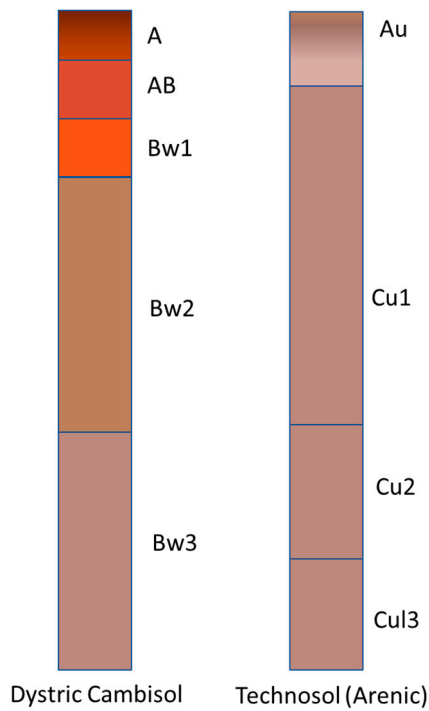

**Figure S3.** Soil profile of the original soil near the experimental site (Dystric Cambisol) and soil after tin mining activities (Technosol) [1,2]. The mining activity influences the topsoil and subsoil of the area. The result is a soil degradation and genesis of an artificial soil.

The Dystric cambisol consists of an A layer (Topsoil with more than 1% soil organic carbon), AB layer (Transition soil horizon from A and B (Transitional horizons)), and Bw layer (Cambic horizon with highly weathered bedrock material).

The Technosol (Arenic) consists of an Au layer (Topsoil with urban and other human-made materials material), Cu layer (Subsurface horizons excluding hard bedrock, but little affected by pedogenetic processes, and resulting from an industrial process or mining activities), and Cul layer (Subsurface horizons excluding hard bedrock, but little affected by pedogenetic processes, and resulting from an industrial process or mining activities, capillary fringe mottling (gleying)).

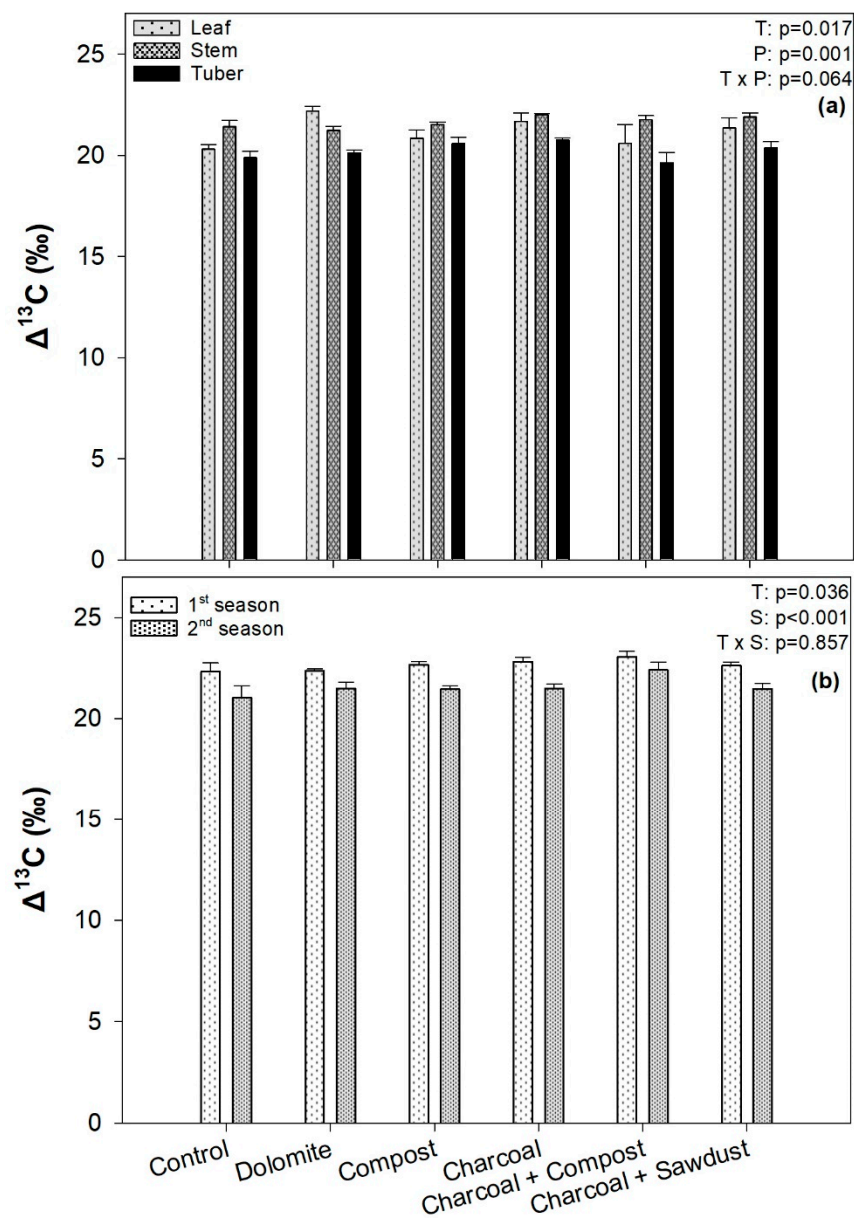

**Figure S4.** Carbon isotope discrimination ( $\Delta^{13}\text{C}$ ) of plant part in cassava (a) and carbon isotope discrimination ( $\Delta^{13}\text{C}$ ) of 1<sup>st</sup> and 2<sup>nd</sup> season centrosema (b) in different soil amendment treatments. Given are mean  $\pm$  SE ( $n = 4$ ). P-values are shown in the upper right corner for cassava and centrosema as revealed by two-way ANOVA.

**Table S1.** Summary of the parametric and robust one-way ANOVA on crop yields and  $\Delta^{13}\text{C}$  in centrosema.

| Parameters                        | F-value | P-value | Significance |
|-----------------------------------|---------|---------|--------------|
| <i>Yields</i>                     |         |         |              |
| Tuber cassava                     | 24.403  | <0.001  | ***          |
| Shoot cassava                     | 23.481  | <0.001  | ***          |
| Centrosema 1 <sup>st</sup> season | 28.519  | <0.001  | ***          |
| Centrosema 2 <sup>nd</sup> season | 2.71    | 0.1002  | ns           |
| Weed                              | 8.74    | 0.0060  | **           |
| <i>Isotope carbon</i>             |         |         |              |
| Centrosema 1 <sup>st</sup> season | 1.236   | 0.333   | ns           |
| Centrosema 2 <sup>nd</sup> season | 1.677   | 0.197   | ns           |

**Table S2.** Summary of the parametric and robust one-way ANOVA on soil parameters at harvest time

| Parameters | F-value | P-value | Significance |
|------------|---------|---------|--------------|
| pH         | 48.509  | <0.001  | ***          |
| CEC        | 44.805  | <0.001  | ***          |
| TN         | 1.445   | 0.313   | ns           |
| TOC        | 8.284   | 0.005   | **           |
| DOC        | 12.684  | <0.001  | ***          |
| TP         | 18.821  | <0.001  | ***          |
| AP         | 16.059  | <0.001  | ***          |
| TK         | 0.483   | 0.784   | ns           |
| AK         | 14.589  | <0.001  | ***          |
| EC         | 59.122  | <0.001  | ***          |
| WHC        | 2.886   | 0.044   | *            |
